# Supplementary material
Source: HighWire-hosted journal article supplement (https://emj.bmj.com/content/emermed-2020-209634)
Supplement: inline-supplementary-material-1 [file inline-supplementary-material-1.pdf]

## **Appendix 1: Evolving COVID-19 Case Definition by Ministry of Health, Singapore**

### **2 January 2020**

- a) A person with clinical signs and symptoms suggestive of pneumonia or severe respiratory infection with breathlessness **AND** travel to or residence in Wuhan city within the last 14 days; or
- b) A person with an acute respiratory illness of any degree of severity who, within 14 days before onset of illness, had close contact with a pneumonia case of unknown cause linked to the Wuhan cluster.

### **21 January 2020**

- a) A person with clinical signs and symptoms suggestive of pneumonia or severe respiratory infection with breathlessness **AND** travel to mainland China within the last 14 days; or
- b) A person with an acute respiratory illness of any degree of severity who, within 14 days before onset of illness, had been to a hospital in mainland China or had close contact with a case of 2019 novel coronavirus infection.

### **23 January 2020**

- a) A person with clinical signs and symptoms suggestive of pneumonia or severe respiratory infection with breathlessness **AND** travel to mainland China within **14 days before onset of illness**; or
- b) A person with an acute respiratory illness of any degree of severity who, within 14 days before onset of illness, had been to a hospital in mainland China or had close contact with a case of 2019 novel coronavirus infection.

### **25 January 2020**

- a) A person with **respiratory infection** with breathlessness **AND** travel to mainland China within 14 days before onset of illness; or
- b) A person with an acute respiratory illness of any degree of severity who, within 14 days before onset of illness who had:
  - i. **Been to Wuhan city or Hubei Province, China; OR**
  - ii. Been to a hospital in mainland China; **OR**
  - iii. Had close contact with a case of 2019 novel coronavirus infection.

**4 February 2020**

a) A person with clinical signs and symptoms suggestive of pneumonia or severe respiratory infection with breathlessness **AND** travel to mainland China within 14 days before onset of illness; or

b) A person with an acute respiratory illness of any degree of severity who, within 14 days before onset of illness had:

i. Been to Hubei Province (including Wuhan city) or **Zhejiang Province (including Hangzhou city)**, China; **OR**

ii. Been to a hospital in mainland China; **OR**

iii. Had close contact with a case of 2019 novel coronavirus infection; **OR**

iv. **Had frequent or close contact during work with recent travellers from mainland China (travel history in the last 14 days).**

**23 February 2020**

a) A person with clinical signs and symptoms suggestive of pneumonia or severe respiratory infection with breathlessness **AND** travel to:

i. **mainland China**; OR

ii. **Daegu City or Cheongdo County**, South Korea.

b) A person with an acute respiratory illness of any degree of severity who, within 14 days before onset of illness had:

i. Been to Hubei Province (including Wuhan city) or **Zhejiang Province (including Hangzhou city)**, China; **OR**

ii. Been to a **hospital in mainland China**; **OR**

iii. Had **close contact** with a case of COVID-19 infection.

**3 March 2020**

a) A person with clinical signs and symptoms suggestive of pneumonia or severe respiratory infection with breathlessness **AND** who within 14 days before onset of illness had travelled to **affected areas** as listed on the Healthcare Professionals Portal (Mainland China, Republic of Korea, Japan, Northern Italy (including Milan and Venice) and Iran).

b) A person with an acute respiratory illness of any degree of severity who, within 14 days before onset of illness had:

i. Been to Hubei Province (including Wuhan city), China, **Daegu city or Cheongdo County, Republic of Korea**; **OR**

ii. Been to a hospital in **affected areas**; **OR**

iii. Had close contact with a case of COVID-19 infection.

**10 March 2020**

a) A person with clinical signs and symptoms suggestive of pneumonia or severe respiratory infection with breathlessness **AND** who within 14 days before onset of illness had **travelled abroad (i.e. to any country outside of Singapore)**.

b) A person with an acute respiratory illness of any degree of severity who, within 14 days before onset of illness had:

i. Been to any of the **areas requiring heightened vigilance**<sup>1</sup> as listed on the Healthcare Professionals Portal: <https://www.moh.gov.sg/hpp/all-healthcare-professionals>; **OR**

ii. Been to **any hospital abroad**; **OR**

iii. Close contact with a case of COVID-19 infection.

<sup>1</sup>Refers to affected areas with high disease load or high connectivity to Singapore. As of 9 March 2020, these are: Mainland China, Republic of Korea, Italy, Iran, France, Germany, Spain, Japan and the United Kingdom.
